# Supplementary material for: Imaging-Based Characterization of a Slco2b1(-/-) Mouse Model Using [11C]Erlotinib and [99mTc]Mebrofenin as Probe Substrates
Source: MDPI journal article supplement (doi:10.3390/pharmaceutics13060918), 2021-06-21
Supplement: s1 [file s1]

# Supplementary Materials: Imaging-Based Characterization of a *Slco2b1*<sup>(-/-)</sup> Mouse Model Using [<sup>11</sup>C]erlotinib and [<sup>99m</sup>Tc]mebrofenin as Probe Substrates

Solène Marie, Irene Hernández-Lozano, Louise Breuil, Charles Truillet, Shuiying Hu, Alex Sparreboom, Nicolas Tournier and Oliver Langer

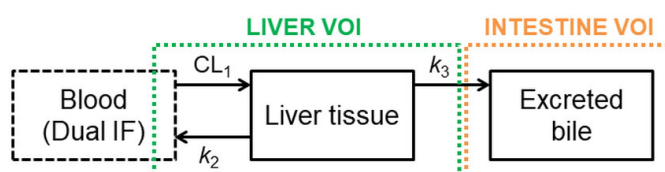

**Figure S1.** Pharmacokinetic model implemented to assess the hepatobiliary disposition of [<sup>11</sup>C]erlotinib and [<sup>99m</sup>Tc]mebrofenin.  $CL_1$  (mL/min) represents the hepatic uptake clearance, and  $k_2$  and  $k_3$  (min<sup>-1</sup>) are the rate constants defining the transfer of radioactivity from liver to blood and from liver to intestine, respectively. The model was modified from a previously published liver model [15]. IF, input function; VOI, volume of interest.

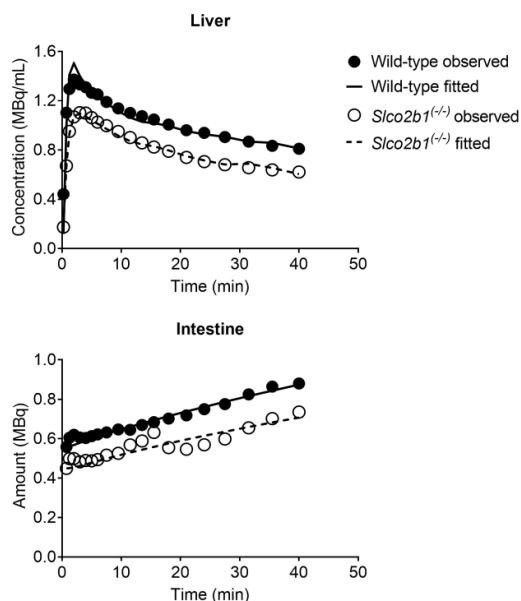

**Figure S2.** Observed and fitted time-activity curves (MBq/mL or MBq) of [<sup>11</sup>C]erlotinib in the liver and intestine in one representative wild-type and *Slco2b1*<sup>(-/-)</sup> mouse.

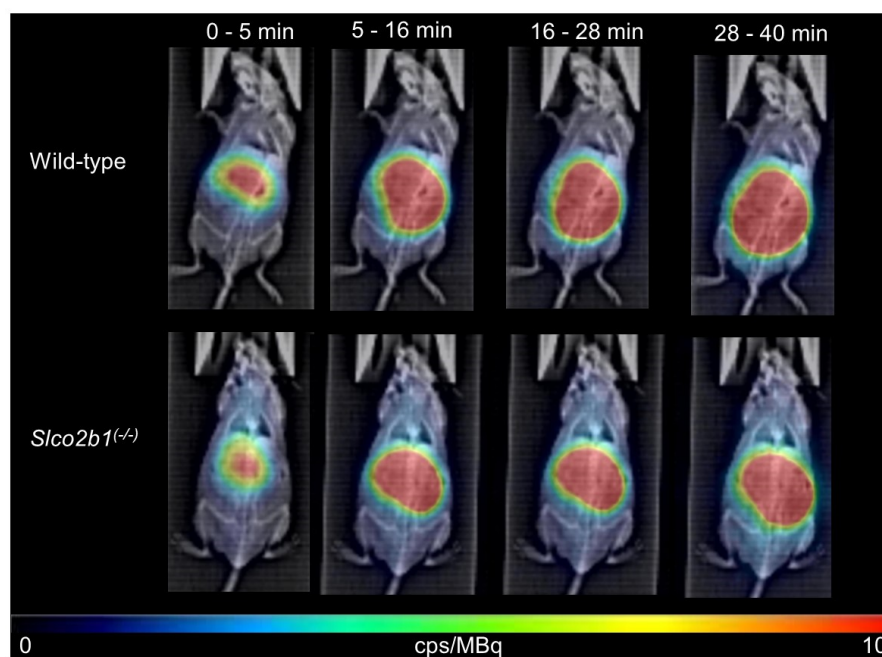

**Figure S3.** Serial CT-co-registered planar scintigraphy images of one representative wild-type and *Slco2b1*<sup>(-/-)</sup> mouse after i.v. injection of [<sup>99m</sup>Tc]mebrofenin. Radioactivity counts (counts per second, cps) are normalized to the injected radioactivity amount (cps/MBq).

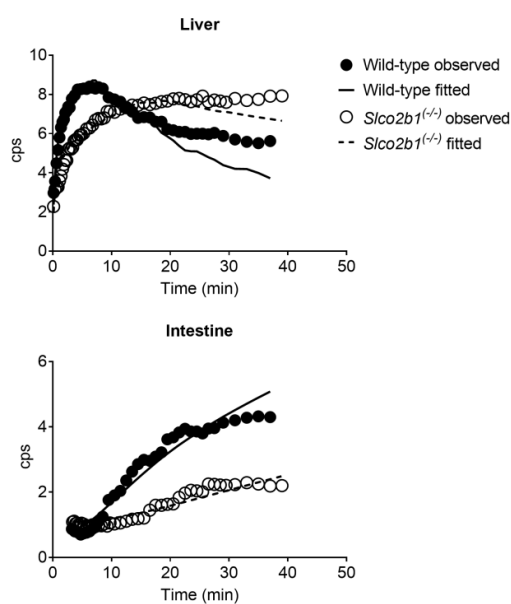

**Figure S4.** Observed and fitted time-activity curves (cps) of [<sup>99m</sup>Tc]mebrofenin in the liver and intestine in one representative wild-type and *Slco2b1*<sup>(-/-)</sup> mouse.
